# Supplementary material
Source: ML conference proceedings conference paper supplement (https://proceedings.neurips.cc/paper_files/paper/2016/hash/ea6b2efbdd4255a9f1b3bbc6399b58f4-Abstract.html)
Supplement: Supplementary file [file ea6b2efbdd4255a9f1b3bbc6399b58f4-Supplemental.zip]

---

# Supplementary Material for

## A Multi-step Inertial Forward–Backward Splitting Method for Non-convex Optimization

---

**Jingwei Liang and Jalal M. Fadili**  
 Normandie Univ, ENSICAEN, CNRS, GREYC  
 {Jingwei.Liang, Jalal.Fadili}@greyc.ensicaen.fr

**Gabriel Peyré**  
 CNRS, DMA, ENS Paris  
 Gabriel.Peyre@ens.fr

### 1 Proof of Theorem 2.2

**Lemma 1.** Let  $\{d_k\}_{k \in \mathbb{N}}$ ,  $\{\varepsilon_k\}_{k \in \mathbb{N}}$  be two non-negative sequences, and  $\{\omega_i\}_{i \in I} \in \mathbb{R}^s$  such that

$$d_{k+1} \leq \sum_{i \in I} \omega_i d_{k-i} + \varepsilon_k, \quad (1)$$

for all  $k \geq s$ . If  $\sum_i \omega_i \in [0, 1[$  and  $\sum_{k \in \mathbb{N}} \varepsilon_k < +\infty$ , then

$$\sum_{k \in \mathbb{N}} d_k < +\infty.$$

**Remark 2.** Lemma 1 is an extension of [3, Lemma 3]. It should be noted that in our case, non-negativity is *not* imposed to the weight  $\omega_i$ 's, but only the sum of them. In fact, we can even afford all  $\omega_i$ 's to be negative, as long as  $\sum_{i \in I} \omega_i d_{k-i} + \varepsilon_k$  is positive for all  $k \in \mathbb{N}$ .

**Proof.** From (1), suppose that  $d_{-1} = d_{-2} = \dots = d_{-s+1} = 0$ , then sum up for both sides from  $k = 0$ ,

$$\begin{aligned} \sum_{k \in \mathbb{N}} d_{k+1} &\leq \sum_{k \in \mathbb{N}} \sum_{i \in I} \omega_i d_{k-i} + \sum_{k \in \mathbb{N}} \varepsilon_k \implies \sum_{k \in \mathbb{N}} d_k \leq d_0 + \sum_{i \in I} \omega_i \sum_{k \in \mathbb{N}} d_k + \sum_{k \in \mathbb{N}} \varepsilon_k \\ &\implies \left(1 - \sum_{i \in I} \omega_i\right) \sum_{k \in \mathbb{N}} d_k \leq d_0 + \sum_{k \in \mathbb{N}} \varepsilon_k. \end{aligned}$$

Since we assume  $\sum_{i \in I} \omega_i < 1$  and  $\varepsilon_k$  is summable, then we have

$$\sum_{k \in \mathbb{N}} d_k \leq \left(1 - \sum_{i \in I} \omega_i\right)^{-1} \left(d_0 + \sum_{k \in \mathbb{N}} \varepsilon_k\right) < +\infty,$$

which concludes the proof. □

Define  $\Delta_k \stackrel{\text{def}}{=} \|x_k - x_{k-1}\|$ .

**Lemma 3.** For the update of  $x_{k+1}$  in (1.7), given any  $k \in \mathbb{N}$ , define

$$g_{k+1} \stackrel{\text{def}}{=} \frac{1}{\gamma_k} (y_{a,k} - x_{k+1}) - \nabla F(y_{b,k}) + \nabla F(x_{k+1}).$$

We have  $g_{k+1} \in \partial \Phi(x_{k+1})$ , and moreover,

$$\|g_{k+1}\| \leq \left(\frac{1}{\underline{\gamma}} + L\right) \Delta_{k+1} + \sum_{i \in I} \left(\frac{|a_{i,k}|}{\underline{\gamma}} + |b_{i,k}|\right) \Delta_{k-i}. \quad (2)$$

**Proof.** From the definition of the proximity operator and the update of  $x_{k+1}$  (1.7), we have  $y_{a,k} - \gamma_k \nabla F(y_{b,k}) - x_{k+1} \in \gamma_k \partial R(x_{k+1})$ . Adding  $\gamma_k \nabla F(x_{k+1})$  to both sides, we get

$$g_{k+1} = \frac{y_{a,k} - \gamma_k \nabla F(y_{b,k}) - x_{k+1} + \gamma_k \nabla F(x_{k+1})}{\gamma_k} \in \partial \Phi(x_{k+1}).$$

Now, applying the triangle inequality and using Lipschitz continuity of  $\nabla F$ , we get

$$\begin{aligned} \|g_{k+1}\| &= \left\| \frac{1}{\gamma_k} (y_{a,k} - x_{k+1}) - \nabla F(y_{b,k}) + \nabla F(x_{k+1}) \right\| \\ &\leq \frac{1}{\gamma_k} \|y_{a,k} - x_{k+1}\| + L \|y_{b,k} - x_{k+1}\| \\ &\leq \frac{1}{\gamma_k} (\Delta_{k+1} + \sum_{i \in I} |a_{i,k}| \Delta_{k-i}) + L (\Delta_{k+1} + \sum_{i \in I} |b_{i,k}| \Delta_{k-i}) \\ &\leq \left( \frac{1}{\underline{\gamma}} + L \right) \Delta_{k+1} + \sum_{i \in I} \left( \frac{|a_{i,k}|}{\underline{\gamma}} + |b_{i,k}| \right) \Delta_{k-i}, \end{aligned}$$

which concludes the proof.  $\square$

**Lemma 4.** For Algorithm 1, given the parameters  $\gamma_k, a_{i,k}, b_{i,k}$ , the following inequality holds

$$\Phi(x_{k+1}) + \underline{\beta} \Delta_{k+1}^2 \leq \Phi(x_k) + \sum_{i \in I} \bar{\alpha}_i \Delta_{k-i}^2. \quad (3)$$

**Proof.** Define the function

$$\mathcal{L}_k(x) = \gamma_k R(x) + \frac{1}{2} \|x - y_{a,k}\|^2 + \gamma_k \langle x, \nabla F(y_{b,k}) \rangle.$$

It can be shown that the update of  $x_{k+1}$  in (1.7) is equivalent to

$$x_{k+1} \in \text{Argmin}_{x \in \mathbb{R}^n} \mathcal{L}_k(x), \quad (4)$$

which means that  $\mathcal{L}_k(x_{k+1}) \leq \mathcal{L}_k(x_k)$ , and

$$R(x_{k+1}) + \frac{1}{2\gamma_k} \|x_{k+1} - y_{a,k}\|^2 + \langle x_{k+1}, \nabla F(y_{b,k}) \rangle \leq R(x_k) + \frac{1}{2\gamma_k} \|x_k - y_{a,k}\|^2 + \langle x_k, \nabla F(y_{b,k}) \rangle,$$

which in turn leads to,

$$\begin{aligned} R(x_k) &\geq R(x_{k+1}) + \frac{1}{2\gamma_k} \|x_{k+1} - y_{a,k}\|^2 + \langle x_{k+1} - x_k, \nabla F(y_{b,k}) \rangle - \frac{1}{2\gamma_k} \|x_k - y_{a,k}\|^2 \\ &= R(x_{k+1}) + \langle x_{k+1} - x_k, \nabla F(x_k) \rangle + \frac{1}{2\gamma_k} \Delta_{k+1}^2 \\ &\quad + \frac{1}{\gamma_k} \langle x_k - x_{k+1}, \sum_{i \in I} a_{i,k} (x_{k-i} - x_{k-i-1}) \rangle + \langle x_{k+1} - x_k, \nabla F(y_{b,k}) - \nabla F(x_k) \rangle. \end{aligned} \quad (5)$$

Since  $\nabla F$  is  $L$ -Lipschitz, we have the classical inequality

$$\langle \nabla F(x_k), x_{k+1} - x_k \rangle \geq F(x_{k+1}) - F(x_k) - \frac{L}{2} \Delta_{k+1}^2.$$

Applying Young's inequality, we obtain

$$\begin{aligned} \langle x_k - x_{k+1}, \sum_{i \in I} a_{i,k} (x_{k-i} - x_{k-i-1}) \rangle &\geq -\left( \frac{\mu}{2} \Delta_{k+1}^2 + \frac{1}{2\mu} \left\| \sum_{i \in I} a_{i,k} (x_{k-i} - x_{k-i-1}) \right\|^2 \right) \\ &\geq -\left( \frac{\mu}{2} \Delta_{k+1}^2 + \sum_{i \in I} \frac{s a_{i,k}^2}{2\mu} \Delta_{k-i}^2 \right), \end{aligned} \quad (6)$$

where  $\mu > 0$ . Similarly, for  $\nu > 0$ , we have

$$\begin{aligned} \langle x_{k+1} - x_k, \nabla F(y_{b,k}) - \nabla F(x_k) \rangle &\geq -\left( \frac{\nu}{2} \Delta_{k+1}^2 + \frac{1}{2\nu} \|\nabla F(y_{b,k}) - \nabla F(x_k)\|^2 \right) \\ &\geq -\left( \frac{\nu}{2} \Delta_{k+1}^2 + \sum_{i \in I} \frac{s b_{i,k}^2 L^2}{2\nu} \Delta_{k-i}^2 \right). \end{aligned} \quad (7)$$

Combining (5), (6) and (7) leads to

$$\Phi(x_{k+1}) + \beta_k \Delta_{k+1}^2 \leq \Phi(x_k) + \sum_{i \in I} \left( \frac{s a_{i,k}^2}{2\gamma_k \mu} + \frac{s b_{i,k}^2 L^2}{2\nu} \right) \Delta_{k-i}^2 = \Phi(x_k) + \sum_{i \in I} \alpha_{k,i} \Delta_{k-i}^2. \quad (8)$$

Therefore, we obtain

$$\Phi(x_{k+1}) + \underline{\beta}\Delta_{k+1}^2 \leq \Phi(x_{k+1}) + \beta_k\Delta_{k+1}^2 \leq \Phi(x_k) + \sum_{i \in I} \alpha_{k,i}\Delta_{k-i}^2 \leq \Phi(x_k) + \sum_{i \in I} \bar{\alpha}_i\Delta_{k-i}^2,$$

which concludes the proof.  $\square$

Define  $\mathbb{R}_s^n$  the product space  $\mathbb{R}_s^n \stackrel{\text{def}}{=} \underbrace{\mathbb{R}^n \times \cdots \times \mathbb{R}^n}_{s \text{ times}}$  and  $z_k = (x_k, x_{k-1}, \dots, x_{k-s+1}) \in \mathbb{R}_s^n$ . Then given  $z_k$ , define the function

$$\Psi(z_k) = \Phi(x_k) + \sum_{i \in I} \sum_{j=i}^{s-1} \bar{\alpha}_j \Delta_{k-i}^2,$$

which is a KL function if  $\Phi$  is. Denote  $\mathcal{C}_{x_k}, \mathcal{C}_{z_k}$  the set of cluster points of  $\{x_k\}_{k \in \mathbb{N}}$  and  $\{z_k\}_{k \in \mathbb{N}}$  respectively, and  $\text{crit}(\Psi) = \{z = (x, \dots, x) \in \mathbb{R}_s^n : x \in \text{crit}(\Phi)\}$ .

**Lemma 5.** *For Algorithm 1, choose  $\mu, \nu, \gamma_k, a_{i,k}, b_{i,k}$  such that (2.3) holds. If  $\Phi$  is bounded from below, then*

- (i)  $\sum_{k \in \mathbb{N}} \Delta_k^2 < +\infty$ ;
- (ii) *The sequence  $\Psi(z_k)$  is monotonically decreasing and convergent;*
- (iii) *The sequence  $\Phi(x_k)$  is convergent.*

**Proof.** Define

$$\delta = \underline{\beta} - \sum_{i \in I} \bar{\alpha}_i > 0.$$

From the Lemma 4, we have

$$\delta \Delta_{k+1}^2 \leq (\Phi(x_k) - \Phi(x_{k+1})) + \sum_{i \in I} \bar{\alpha}_i (\Delta_{k-i}^2 - \Delta_{k+1}^2).$$

Since we let  $x_{1-s} = \dots = x_0 = x_1$ , for the above inequality, sum over  $k$  we get

$$\begin{aligned} \delta \sum_{k \in \mathbb{N}} \Delta_{k+1}^2 &\leq \sum_{k \in \mathbb{N}} (\Phi(x_k) - \Phi(x_{k+1})) + \sum_{k \in \mathbb{N}} \sum_{i \in I} \bar{\alpha}_i (\Delta_{k-i}^2 - \Delta_{k+1}^2) \\ &\leq \Phi(x_0) + \sum_{i \in I} \bar{\alpha}_i \sum_{k \in \mathbb{N}} (\Delta_{k-i}^2 - \Delta_{k+1}^2) \\ &= \Phi(x_0) + \sum_{i \in I} \bar{\alpha}_i \sum_{j=1-i}^1 \Delta_j^2 = \Phi(x_0), \end{aligned}$$

which means, as  $\Phi(x_0)$  is bounded,

$$\sum_{k \in \mathbb{N}} \Delta_{k+1}^2 \leq \frac{\Phi(x_0)}{\delta} < +\infty.$$

From Lemma 4, by pairing terms on both sides of (3), we get

$$\Psi(z_{k+1}) + \left( \underline{\beta} - \sum_{i \in I} \bar{\alpha}_i \right) \Delta_{k+1}^2 \leq \Psi(z_k).$$

Since we assume  $\underline{\beta} - \sum_{i \in I} \bar{\alpha}_i > 0$ , hence  $\Psi(z_k)$  is monotonically non-increasing. The convergence of  $\Phi(x_k)$  is straightforward.  $\square$

**Lemma 6.** *For Algorithm 1, choose  $\mu, \nu, \gamma_k, a_{i,k}, b_{i,k}$  such that (2.3) holds. If  $\Phi$  is bounded from below and  $\{x_k\}_{k \in \mathbb{N}}$  is bounded, then  $x_k$  converges to a critical point of  $\Phi$ .*

**Proof.** Since  $\{x_k\}_{k \in \mathbb{N}}$  is bounded, there exists a subsequence  $\{x_{k_j}\}_{j \in \mathbb{N}}$  and cluster point  $\bar{x}$  such that  $x_{k_j} \rightarrow \bar{x}$  as  $j \rightarrow \infty$ . Next we show that  $\Phi(x_{k_j}) \rightarrow \Phi(\bar{x})$  and that  $\bar{x}$  is a critical point of  $\Phi$ .

Since  $R$  is lsc, then  $\liminf_{j \rightarrow \infty} R(x_{k_j}) \geq R(\bar{x})$ . From (4), we have  $\mathcal{L}_{k_j-1}(x_{k_j}) \leq \mathcal{L}_{k_j-1}(\bar{x})$ ,

$$\begin{aligned} R(\bar{x}) &\geq R(x_{k_j}) + \frac{1}{2\gamma_{k_j-1}} \|x_{k_j} - y_{a,k_j-1}\|^2 + \langle x_{k_j} - \bar{x}, \nabla F(y_{b,k_j-1}) \rangle - \frac{1}{2\gamma_{k_j-1}} \|\bar{x} - y_{a,k_j-1}\|^2 \\ &= R(x_{k_j}) + \frac{1}{2\gamma_{k_j-1}} (\|x_{k_j} - \bar{x}\|^2 + 2\langle x_{k_j} - \bar{x}, \bar{x} - y_{a,k_j-1} \rangle) + \langle x_{k_j} - \bar{x}, \nabla F(y_{b,k_j-1}) \rangle \end{aligned}$$

Since  $\Delta_k^2 \rightarrow 0$  and  $x_{k_j} \rightarrow \bar{x}$ , then passing to the limit in the inequality we obtain  $\limsup_{j \rightarrow \infty} R(x_{k_j}) \leq R(\bar{x})$ . As a result,  $\lim_{k \rightarrow \infty} R(x_{k_j}) = R(\bar{x})$ . Since  $F$  is continuous, then  $F(x_{k_j}) \rightarrow F(\bar{x})$ , hence  $\Phi(x_{k_j}) \rightarrow \Phi(\bar{x})$ .

Furthermore, owing to Lemma 3,  $g_{k_j} \in \partial\Phi(x_{k_j})$ , and (i) of Lemma 5 we have  $g_{k_j} \rightarrow 0$  as  $k \rightarrow \infty$ . As a consequence,

$$g_{k_j} \in \partial\Phi(x_{k_j}), (x_{k_j}, g_{k_j}) \rightarrow (\bar{x}, 0) \text{ and } \Phi(x_{k_j}) \rightarrow \Phi(\bar{x}),$$

as  $j \rightarrow \infty$ . Hence  $0 \in \partial\Phi(\bar{x})$ , i.e.  $\bar{x}$  is a critical point.  $\square$

Now we present the proof of Theorem 2.2.

**Proof of Theorem 2.2.** Putting together the above lemmas, we draw the following useful conclusions:

(R.1) Denote  $\delta = \beta - \sum_{i \in I} \bar{\alpha}_i$ , then  $\Psi(z_{k+1}) + \delta \Delta_{k+1}^2 \leq \Psi(z_k)$ ;

(R.2) Define

$$w_{k+1} \stackrel{\text{def}}{=} \begin{pmatrix} g_{k+1} + 2 \sum_{i=0}^{s-1} \bar{\alpha}_i (x_{k+1} - x_k) \\ 2 \sum_{i=0}^{s-1} \bar{\alpha}_i (x_k - x_{k+1}) + 2 \sum_{i=1}^{s-1} \bar{\alpha}_i (x_k - x_{k-1}) \\ \vdots \\ 2\bar{\alpha}_{s-1} (x_{k+2-s} - x_{k+1-s}) \end{pmatrix},$$

then we have  $w_{k+1} \in \partial\Psi(z_{k+1})$ . Owing to Lemma 3, there exists a  $\sigma > 0$  such that  $\|w_{k+1}\| \leq \sigma \sum_{j=k+2-s}^{k+1} \Delta_j$ ;

(R.3) if  $x_{k_j}$  is a subsequence such that  $x_{k_j} \rightarrow \bar{x}$ , then  $\Psi(z_k) \rightarrow \Psi(\bar{z})$  where  $\bar{z} = (\bar{x}, \dots, \bar{x})$ .

(R.4)  $\mathcal{C}_{z_k} \subseteq \text{crit}(\Psi)$ ;

(R.5)  $\lim_{k \rightarrow \infty} \text{dist}(z_k, \mathcal{C}_{z_k}) = 0$ ;

(R.6)  $\mathcal{C}_{z_k}$  is non-empty, compact and connected;

(R.7)  $\Psi$  is finite and constant on  $\mathcal{C}_{z_k}$ .

Next we prove the claims of Theorem 2.2.

(i) Consider a critical point of  $\Phi$ ,  $\bar{x} \in \text{crit}(\Phi)$ , such that  $\bar{z} = (\bar{x}, \dots, \bar{x}) \in \mathcal{C}_{z_k}$ , then owing to (R.3), we have  $\Psi(z_k) \rightarrow \Psi(\bar{z})$ .

Suppose there exists  $K$  such that  $\Psi(z_K) = \Psi(\bar{z})$ , then the descent property (R.1) implies that  $\Psi(z_k) = \Psi(\bar{z})$  holds for all  $k \geq K$ . Then  $z_k$  is constant for  $k \geq K$ , hence has finite length.

On the other hand, let  $\Psi(z_k) > \Psi(\bar{z})$ , denote  $\psi_k = \Psi(z_k) - \Psi(\bar{z})$ . Owing to (R.6), (R.7) and Definition 2.1, the KL property of  $\Psi$  means that there exist  $\epsilon, \eta$  and a concave function  $\varphi$ , and

$$\mathcal{U} \stackrel{\text{def}}{=} \{u \in \mathbb{R}_s^n : \text{dist}(u, \mathcal{C}_{z_k}) < \epsilon\} \cap [\Psi(\bar{z}) < \Psi(u) < \Psi(\bar{z}) + \eta], \quad (9)$$

such that for all  $z \in \mathcal{U}$ ,

$$\varphi'(\Psi(z) - \Psi(\bar{z})) \text{dist}(0, \partial\Psi(z)) \geq 1. \quad (10)$$

Let  $k_1 \in \mathbb{N}$  be such that  $\Psi(z_k) < \Psi(\bar{z}) + \eta$  holds for all  $k \geq k_1$ . Owing to (R.5), there exists another  $k_2 \in \mathbb{N}$  such that  $\text{dist}(z_k, \mathcal{C}_{z_k}) < \epsilon$  holds for all  $k \geq k_2$ . Let  $K = \max\{k_1, k_2\}$ , then  $z_k \in \mathcal{U}$  holds for all  $k \geq K$ . Then from (10), we have for  $k \geq K$

$$\varphi'(\psi_k) \text{dist}(0, \partial\Psi(z_k)) \geq 1.$$

Since  $\varphi$  is concave,  $\varphi'$  is decreasing, and  $\Psi(z_k)$  is decreasing, we have

$$\varphi(\psi_k) - \varphi(\psi_{k+1}) \geq \varphi'(\psi_k) (\Psi(z_k) - \Psi(z_{k+1})) \geq \frac{\Psi(z_k) - \Psi(z_{k+1})}{\text{dist}(0, \partial\Psi(z_k))}.$$

From (R.1), since  $\text{dist}(0, \partial\Psi(z_k)) \leq \|w_k\|$ , then

$$\varphi(\psi_k) - \varphi(\psi_{k+1}) \geq \frac{\Psi(z_k) - \Psi(z_{k+1})}{\|w_k\|} \geq \frac{\Psi(z_k) - \Psi(z_{k+1})}{\sigma \sum_{j=k+1-s}^k \Delta_j}.$$

Moreover,  $\Psi(z_k) - \Psi(z_{k+1}) \geq \delta \Delta_{k+1}^2$  from (R.2), therefore we get

$$\varphi(\psi_k) - \varphi(\psi_{k+1}) \geq \frac{\delta \Delta_{k+1}^2}{\sigma \sum_{j=k+1-s}^k \Delta_j},$$

which yields

$$\Delta_{k+1}^2 \leq \left( \frac{\sigma}{\delta} (\varphi(\psi_k) - \varphi(\psi_{k+1})) \right) \sum_{j=k+1-s}^k \Delta_j. \quad (11)$$

Taking the square root of both sides and applying Young's inequality with  $\kappa > 0$ , we further obtain

$$\begin{aligned} 2\Delta_{k+1} &\leq \frac{1}{\kappa} \sum_{j=k+1-s}^k \Delta_j + \frac{\kappa\sigma}{\delta} (\varphi(\psi_k) - \varphi(\psi_{k+1})) \\ (\kappa = s) &\leq \frac{1}{s} \sum_{j=k+1-s}^k \Delta_j + \frac{s\sigma}{\delta} (\varphi(\psi_k) - \varphi(\psi_{k+1})). \end{aligned} \quad (12)$$

Summing up both sides over  $k$ , and since  $x_0 = \dots = x_{-s}$ , we get

$$\ell \stackrel{\text{def}}{=} \sum_{k \in \mathbb{N}} \Delta_k \leq \Delta_1 + \frac{s\sigma}{\delta} \varphi(\psi_1) < +\infty,$$

which concludes the finite length property of  $x_k$ .

- (ii) Then the convergence of the sequence follows from the fact that  $\{x_k\}_{k \in \mathbb{N}}$  is a Cauchy sequence, hence convergent. Owing to Lemma 6, there exists a critical point  $x^* \in \text{crit}(\Phi)$  such that  $\lim_{k \rightarrow \infty} x_k = x^*$ .
- (iii) We now turn to proving local convergence to a global minimizer. Note that if  $x^*$  is a global minimizer of  $\Phi$ , then  $z^*$  is a global minimizer of  $\Psi$ . Let  $r > \rho > 0$  such that  $\mathbb{B}_r(z^*) \subset \mathcal{U}$  and  $\eta < \delta(r - \rho)^2$ . Suppose that the initial point  $x_0$  is chosen such that following conditions hold,

$$\Psi(z^*) \leq \Psi(z_0) < \Psi(z^*) + \eta \quad (13)$$

$$\|x_0 - x^*\| + \ell(s - 1) + 2\sqrt{\frac{\Psi(z_0) - \Psi(z^*)}{\delta}} + \frac{\sigma}{\delta} \varphi(\psi_0) < \rho. \quad (14)$$

The descent property (R.1) of  $\Psi$  together with (13) imply that for any  $k \in \mathbb{N}$ ,  $\Psi(z^*) \leq \Psi(z_{k+1}) \leq \Psi(z_k) \leq \Psi(z_0) < \Psi(z^*) + \eta$ , and

$$\|x_{k+1} - x_k\| \leq \sqrt{\frac{\Psi(z_k) - \Psi(z_{k+1})}{\delta}} \leq \sqrt{\frac{\Psi(z_k) - \Psi(z^*)}{\delta}}. \quad (15)$$

Therefore, given any  $k \in \mathbb{N}$ , if we have  $x_k \in \mathbb{B}_\rho(x^*)$ , then

$$\begin{aligned} \|x_{k+1} - x^*\| &\leq \|x_k - x^*\| + \|x_{k+1} - x_k\| \leq \|x_k - x^*\| + \sqrt{\frac{\Psi(z_k) - \Psi(z^*)}{\delta}} \\ &\leq \rho + (r - \rho) = r, \end{aligned} \quad (16)$$

which means that  $x_{k+1} \in \mathbb{B}_r(x^*)$ .

For any  $k \in \mathbb{N}$ , define the following partial sum

$$p_k = \sum_{j=k+1-s}^{k-1} \sum_{i=1}^j \Delta_i.$$

Note that  $p_k = 0$  for  $k = 1$ , and  $\lim_{k \rightarrow \infty} p_k = \ell(s - 1)$ . Next we prove the following claims through induction: for  $k \in \mathbb{N}$

$$x_k \in \mathbb{B}_\rho(x^*) \quad (17)$$

$$\sum_{j=1}^k \Delta_{j+1} + \Delta_{k+1} \leq \Delta_1 + p_k + \frac{\sigma}{\delta} (\varphi(\psi_1) - \varphi(\psi_{k+1})). \quad (18)$$

From (15) we have

$$\|x_1 - x_0\| \leq \sqrt{\frac{\Psi(z_0) - \Psi(z^*)}{\delta}}. \quad (19)$$

Applying the triangle inequality we then obtain

$$\|x_1 - x^*\| \leq \|x_0 - x^*\| + \|x_1 - x_0\| \leq \|x_0 - x^*\| + \sqrt{\frac{\Psi(z_0) - \Psi(z^*)}{\delta}} < \rho,$$

which means  $x_1 \in \mathbb{B}_\rho(x^*)$ . Now, taking  $\kappa = 1$  in (12) yields, for any  $k \in \mathbb{N}$ ,

$$2\Delta_{k+1} \leq \sum_{j=k+1-s}^k \Delta_j + \frac{\sigma}{\delta}(\varphi(\psi_k) - \varphi(\psi_{k+1})). \quad (20)$$

Let  $k = 1$ . Since  $x_0 = \dots = x_{-s}$ , we have

$$2\Delta_2 \leq \Delta_1 + \frac{\sigma}{\delta}(\varphi(\psi_1) - \varphi(\psi_2)).$$

Therefore, (17) and (18) hold for  $k = 1$ .

Now assume that they hold for some  $k > 1$ . Using the triangle inequality and (18),

$$\begin{aligned} \|x_{k+1} - x^*\| &\leq \|x_0 - x^*\| + \Delta_1 + \sum_{j=1}^k \Delta_j \\ &\leq \|x_0 - x^*\| + 2\Delta_1 + p_k + \frac{\sigma}{\delta}(\varphi(\psi_1) - \varphi(\psi_{k+1})) \\ &\leq \|x_0 - x^*\| + 2\Delta_1 + (s-1)\ell + \frac{\sigma}{\delta}(\varphi(\psi_1) - \varphi(\psi_{k+1})) \\ (19) &\leq \|x_0 - x^*\| + 2\sqrt{\frac{\Psi(z_0) - \Psi(z^*)}{\delta}} + (s-1)\ell + \frac{\sigma}{\delta}(\varphi(\psi_1) - \varphi(\psi_{k+1})). \end{aligned}$$

As  $\varphi(\psi) \geq 0$  and  $\varphi'(\psi) > 0$  for  $\psi \in ]0, \eta[$ , and in view of (14), we arrive at

$$\|x_{k+1} - x^*\| \leq \|x_0 - x^*\| + 2\sqrt{\frac{\Psi(z_0) - \Psi(z^*)}{\delta}} + (s-1)\ell + \frac{\sigma}{\delta}\varphi(\psi_0) < \rho$$

whence we deduce that (17) holds at  $k+1$ . Now, taking (20) at  $k+1$  gives

$$\begin{aligned} 2\Delta_{k+2} &\leq \sum_{j=k+2-s}^{k+1} \Delta_j + \frac{\sigma}{\delta}(\varphi(\psi_{k+1}) - \varphi(\psi_{k+2})) \\ &\leq \Delta_{k+1} + \sum_{j=k+2-s}^k \Delta_j + \frac{\sigma}{\delta}(\varphi(\psi_{k+1}) - \varphi(\psi_{k+2})). \end{aligned} \quad (21)$$

Adding both sides of (21) and (18) we get

$$\begin{aligned} \sum_{j=1}^{k+1} \Delta_{j+1} + \Delta_{k+2} &\leq \Delta_1 + p_k + \sum_{j=k+2-s}^k \Delta_j + \frac{\sigma}{\delta}(\varphi(\psi_1) - \varphi(\psi_{k+2})) \\ &= \Delta_1 + p_{k+1} + \frac{\sigma}{\delta}(\varphi(\psi_1) - \varphi(\psi_{k+2})), \end{aligned}$$

meaning that (18) holds at  $k+1$ . This concludes the induction proof.

In summary, the above result shows that if we start close enough from  $x^*$  (so that (13)-(14) hold), then the sequence  $\{x_k\}_{k \in \mathbb{N}}$  will remain in the neighbourhood  $\mathbb{B}_\rho(x^*)$  and thus converges to a critical point  $\bar{x}$  owing to Lemma 6. Moreover,  $\Psi(z_k) \rightarrow \Psi(\bar{z}) \geq \Psi(z^*)$  by virtue of **(R.3)**. Now we need to show that  $\Psi(\bar{z}) = \Psi(z^*)$ . Suppose that  $\Psi(\bar{z}) > \Psi(z^*)$ . As  $\Psi$  has the KL property at  $z^*$ , we have

$$\varphi'(\Psi(\bar{z}) - \Psi(z^*)) \text{dist}(0, \partial\Psi(\bar{z})) \geq 1.$$

But this is impossible since  $\varphi'(s) > 0$  for  $s \in ]0, \eta[$ , and  $\text{dist}(0, \partial\Psi(\bar{z})) = 0$  as  $\bar{z}$  is a critical point. Hence we have  $\Psi(\bar{z}) = \Psi(z^*)$ , which means  $\Phi(\bar{x}) = \Phi(x^*)$ , *i.e.* the cluster point  $\bar{x}$  is actually a global minimizer. This concludes the proof.  $\square$

## 2 Proof of Theorem 3.2

**Proof of Theorem 3.2.** Under the conditions of Theorem 2.2, there exists a critical point  $x^* \in \text{crit}(\Phi)$  such that  $x_k \rightarrow x^*$ ,  $R(x_k) \rightarrow R(x^*)$  and  $\Phi(x_k) \rightarrow \Phi(x^*)$  (see the proof of Lemma 6).

Convergence properties of  $\{x_k\}_{k \in \mathbb{N}}$  (Theorem 2.2) entails  $\|y_{a,k} - x_k\| \rightarrow 0$  and  $\|y_{b,k} - x^*\| \rightarrow 0$ . In turn,

$$\text{dist}(-\nabla F(x^*), \partial R(x_{k+1})) \leq \frac{1}{\underline{\gamma}} \|y_{a,k} - x_{k+1}\| + \frac{1}{\underline{\beta}} \|y_{b,k} - x^*\| \rightarrow 0.$$

Altogether, this shows that the conditions of [10, Theorem 4.10] or [6, Proposition 10.12] are fulfilled on  $R$  at  $x^*$  for  $-\nabla F(x^*)$ , and the identification result follows.  $\square$

### 3 Proof of Theorem 3.4

Before presenting the proofs, we need some extra result from partial smoothness, and also Riemannian geometry.

#### 3.1 Partial smoothness and Riemannian geometry

From the sharpness in Definition 3.1, Proposition 2.10 of [9] allows to prove the following fact.

**Fact 7 (Local normal sharpness).** If  $R \in \text{PSF}_x(\mathcal{M})$ , then all  $x' \in \mathcal{M}$  near  $x$  satisfy  $\mathcal{T}_{\mathcal{M}}(x') = T_{x'}$ . In particular, when  $\mathcal{M}$  is affine or linear, then  $T_{x'} = T_x$ .

We now give expressions of the Riemannian gradient and Hessian (see Section 3.2 for definitions) for the case of partly smooth functions relative to a  $C^2$  submanifold. This is summarized in the following fact which follows by combining (23), (24), Definition 3.1, Fact 7 and [5, Proposition 17] (or [13, Lemma 2.4]).

**Fact 8.** If  $R \in \text{PSF}_x(\mathcal{M})$ , then for any  $x' \in \mathcal{M}$  near  $x$

$$\nabla_{\mathcal{M}} R(x') = P_{T_{x'}}(\partial R(x')),$$

and this does not depend on the smooth representation of  $R$  on  $\mathcal{M}$ . In turn, for all  $h \in T_{x'}$

$$\nabla_{\mathcal{M}}^2 G(x')h = P_{T_{x'}} \nabla^2 \tilde{R}(x')h + \mathfrak{W}_{x'}(h, P_{T_x^\perp} \nabla \tilde{R}(x')),$$

where  $\tilde{R}$  is a smooth extension (representative) of  $R$  on  $\mathcal{M}$ , and  $\mathfrak{W}_x(\cdot, \cdot) : T_x \times T_x^\perp \rightarrow T_x$  is the Weingarten map of  $\mathcal{M}$  at  $x$  (see Section 3.2 below for definitions).

#### 3.2 Riemannian Geometry

Let  $\mathcal{M}$  be a  $C^2$ -smooth embedded submanifold of  $\mathbb{R}^n$  around a point  $x$ . With some abuse of terminology, we shall state  $C^2$ -manifold instead of  $C^2$ -smooth embedded submanifold of  $\mathbb{R}^n$ . The natural embedding of a submanifold  $\mathcal{M}$  into  $\mathbb{R}^n$  permits to define a Riemannian structure and to introduce geodesics on  $\mathcal{M}$ , and we simply say  $\mathcal{M}$  is a Riemannian manifold. We denote respectively  $\mathcal{T}_{\mathcal{M}}(x)$  and  $\mathcal{N}_{\mathcal{M}}(x)$  the tangent and normal space of  $\mathcal{M}$  at point near  $x$  in  $\mathcal{M}$ .

**Exponential map** Geodesics generalize the concept of straight lines in  $\mathbb{R}^n$ , preserving the zero acceleration characteristic, to manifolds. Roughly speaking, a geodesic is locally the shortest path between two points on  $\mathcal{M}$ . We denote by  $\mathfrak{g}(t; x, h)$  the value at  $t \in \mathbb{R}$  of the geodesic starting at  $\mathfrak{g}(0; x, h) = x \in \mathcal{M}$  with velocity  $\dot{\mathfrak{g}}(t; x, h) = \frac{d\mathfrak{g}}{dt}(t; x, h) = h \in \mathcal{T}_{\mathcal{M}}(x)$  (which is uniquely defined). For every  $h \in \mathcal{T}_{\mathcal{M}}(x)$ , there exists an interval  $I$  around 0 and a unique geodesic  $\mathfrak{g}(t; x, h) : I \rightarrow \mathcal{M}$  such that  $\mathfrak{g}(0; x, h) = x$  and  $\dot{\mathfrak{g}}(0; x, h) = h$ . The mapping

$$\text{Exp}_x : \mathcal{T}_{\mathcal{M}}(x) \rightarrow \mathcal{M}, \quad h \mapsto \text{Exp}_x(h) = \mathfrak{g}(1; x, h),$$

is called *Exponential map*. Given  $x, x' \in \mathcal{M}$ , the direction  $h \in \mathcal{T}_{\mathcal{M}}(x)$  we are interested in is such that

$$\text{Exp}_x(h) = x' = \mathfrak{g}(1; x, h).$$

**Parallel translation** Given two points  $x, x' \in \mathcal{M}$ , let  $\mathcal{T}_{\mathcal{M}}(x), \mathcal{T}_{\mathcal{M}}(x')$  be their corresponding tangent spaces. Define

$$\tau : \mathcal{T}_{\mathcal{M}}(x) \rightarrow \mathcal{T}_{\mathcal{M}}(x'),$$

the parallel translation along the unique geodesic joining  $x$  to  $x'$ , which is isomorphism and isometry w.r.t. the Riemannian metric.

**Riemannian gradient and Hessian** For a vector  $v \in \mathcal{N}_{\mathcal{M}}(x)$ , the Weingarten map of  $\mathcal{M}$  at  $x$  is the operator  $\mathfrak{W}_x(\cdot, v) : \mathcal{T}_{\mathcal{M}}(x) \rightarrow \mathcal{T}_{\mathcal{M}}(x)$  defined by

$$\mathfrak{W}_x(\cdot, v) = -P_{\mathcal{T}_{\mathcal{M}}(x)} dV[h],$$

where  $V$  is any local extension of  $v$  to a normal vector field on  $\mathcal{M}$ . The definition is independent of the choice of the extension  $V$ , and  $\mathfrak{W}_x(\cdot, v)$  is a symmetric linear operator which is closely tied to the second fundamental form of  $\mathcal{M}$ , see [4, Proposition II.2.1].

Let  $G$  be a real-valued function which is  $C^2$  along the  $\mathcal{M}$  around  $x$ . The covariant gradient of  $G$  at  $x' \in \mathcal{M}$  is the vector  $\nabla_{\mathcal{M}}G(x') \in \mathcal{T}_{\mathcal{M}}(x')$  defined by

$$\langle \nabla_{\mathcal{M}}G(x'), h \rangle = \frac{d}{dt}G(P_{\mathcal{M}}(x' + th)) \Big|_{t=0}, \quad \forall h \in \mathcal{T}_{\mathcal{M}}(x'),$$

where  $P_{\mathcal{M}}$  is the projection operator onto  $\mathcal{M}$ . The covariant Hessian of  $G$  at  $x'$  is the symmetric linear mapping  $\nabla_{\mathcal{M}}^2G(x')$  from  $\mathcal{T}_{\mathcal{M}}(x')$  to itself which is defined as

$$\langle \nabla_{\mathcal{M}}^2G(x')h, h \rangle = \frac{d^2}{dt^2}G(P_{\mathcal{M}}(x' + th)) \Big|_{t=0}, \quad \forall h \in \mathcal{T}_{\mathcal{M}}(x'). \quad (22)$$

This definition agrees with the usual definition using geodesics or connections [13]. Now assume that  $\mathcal{M}$  is a Riemannian embedded submanifold of  $\mathbb{R}^n$ , and that a function  $G$  has a  $C^2$ -smooth restriction on  $\mathcal{M}$ . This can be characterized by the existence of a  $C^2$ -smooth extension (representative) of  $G$ , i.e. a  $C^2$ -smooth function  $\tilde{G}$  on  $\mathbb{R}^n$  such that  $\tilde{G}$  agrees with  $G$  on  $\mathcal{M}$ . Thus, the Riemannian gradient  $\nabla_{\mathcal{M}}G(x')$  is also given by

$$\nabla_{\mathcal{M}}G(x') = P_{\mathcal{T}_{\mathcal{M}}(x')} \nabla \tilde{G}(x'), \quad (23)$$

and  $\forall h \in \mathcal{T}_{\mathcal{M}}(x')$ , the Riemannian Hessian reads

$$\begin{aligned} \nabla_{\mathcal{M}}^2G(x')h &= P_{\mathcal{T}_{\mathcal{M}}(x')} d(\nabla_{\mathcal{M}}G)(x')[h] = P_{\mathcal{T}_{\mathcal{M}}(x')} d(x' \mapsto P_{\mathcal{T}_{\mathcal{M}}(x')} \nabla_{\mathcal{M}}\tilde{G})[h] \\ &= P_{\mathcal{T}_{\mathcal{M}}(x')} \nabla^2 \tilde{G}(x')h + \mathfrak{W}_{x'}(h, P_{\mathcal{N}_{\mathcal{M}}(x')} \nabla \tilde{G}(x')), \end{aligned} \quad (24)$$

where the last equality comes from [1, Theorem 1]. When  $\mathcal{M}$  is an affine or linear subspace of  $\mathbb{R}^n$ , then obviously  $\mathcal{M} = x + \mathcal{T}_{\mathcal{M}}(x)$ , and  $\mathfrak{W}_{x'}(h, P_{\mathcal{N}_{\mathcal{M}}(x')} \nabla \tilde{G}(x')) = 0$ , hence (24) reduces to

$$\nabla_{\mathcal{M}}^2G(x') = P_{\mathcal{T}_{\mathcal{M}}(x')} \nabla^2 \tilde{G}(x') P_{\mathcal{T}_{\mathcal{M}}(x')}.$$

See [8, 4] for more materials on differential and Riemannian manifolds.

The following lemmas summarize two key properties that we will need throughout.

**Lemma 9.** *Let  $x \in \mathcal{M}$ , and  $x_k$  a sequence converging to  $x$  in  $\mathcal{M}$ . Denote  $\tau_k : \mathcal{T}_{\mathcal{M}}(x) \rightarrow \mathcal{T}_{\mathcal{M}}(x_k)$  be the parallel translation along the unique geodesic joining  $x$  to  $x_k$ . Then, for any bounded vector  $u \in \mathbb{R}^n$ , we have*

$$(\tau_k^{-1} P_{\mathcal{T}_{\mathcal{M}}(x_k)} - P_{\mathcal{T}_{\mathcal{M}}(x)})u = o(\|u\|).$$

**Proof.** See Lemma B.1 of [12]. □

**Lemma 10.** *Let  $x, x'$  be two close points in  $\mathcal{M}$ , denote  $\tau : \mathcal{T}_{\mathcal{M}}(x) \rightarrow \mathcal{T}_{\mathcal{M}}(x')$  the parallel translation along the unique geodesic joining  $x$  to  $x'$ . The Riemannian Taylor expansion of  $\Phi \in C^2(\mathcal{M})$  around  $x$  reads,*

$$\tau^{-1} \nabla_{\mathcal{M}}\Phi(x') = \nabla_{\mathcal{M}}\Phi(x) + \nabla_{\mathcal{M}}^2\Phi(x) P_{\mathcal{T}_{\mathcal{M}}(x)}(x' - x) + o(\|x' - x\|).$$

**Proof.** See Lemma B.2 of [12]. □

### 3.3 Proof of Theorem 3.4

The proof of Theorem 1 consists of several steps, first we prove that under the required setting, we can obtain (3.5), i.e. the linearized fixed-point iteration.

**Proposition 11 (Locally linearized iteration).** *For Algorithm 1, suppose that the conditions in Theorem 2.2 hold so that the generated sequence  $\{x_k\}_{k \in \mathbb{N}}$  converges to a critical point  $x^* \in \text{crit}(\Phi)$  such that Theorem 3.2 and condition (3.2) and (3.3) hold. Then for all  $k$  large enough, we have*

$$d_{k+1} = Md_k + o(\|d_k\|). \quad (25)$$

The term  $o(\cdot)$  vanishes if  $R$  is polyhedral around  $x^*$  and  $(\gamma_k, a_{i,k}, b_{i,k})$  are chosen constant.



Define the iteration-dependent versions of the matrices in (3.1) and (3.4), *i.e.*

$$\begin{aligned}
H_k &\stackrel{\text{def}}{=} \gamma_k P_{T_{x^*}} \nabla^2 F(x^*) P_{T_{x^*}}, \quad G_k \stackrel{\text{def}}{=} \text{Id} - H_k, \quad Q_k \stackrel{\text{def}}{=} \gamma_k \nabla_{\mathcal{M}_{x^*}}^2 \Phi(x^*) P_{T_{x^*}} - H_k, \\
M_{k,0} &\stackrel{\text{def}}{=} (a_{k,0} - b_{k,0})P + (1 + b_{k,0})PG, \quad M_{k,s} \stackrel{\text{def}}{=} -(a_{k,s-1} - b_{k,s-1})P - b_{k,s-1}PG, \\
M_{k,i} &\stackrel{\text{def}}{=} -((a_{k,i-1} - a_{k,i}) - (b_{k,i-1} - b_{k,i}))P - (b_{k,i-1} - b_{k,i})PG, \quad i = 1, \dots, s-1, \\
M_k &\stackrel{\text{def}}{=} \begin{bmatrix} M_{k,0} & M_{k,1} & \cdots & M_{k,s-1} & M_{k,s} \\ \text{Id} & 0 & \cdots & 0 & 0 \\ 0 & \text{Id} & \cdots & 0 & 0 \\ \vdots & \vdots & \ddots & \vdots & \vdots \\ 0 & 0 & \cdots & \text{Id} & 0 \end{bmatrix}.
\end{aligned} \tag{26}$$

After the finite identification of  $\mathcal{M}_{x^*}$ , we have  $x_k \in \mathcal{M}_{x^*}$  for  $x_k$  close enough to  $x^*$ . Let  $T_{x_k}$  be their corresponding tangent spaces, and define  $\tau_k : T_{x^*} \rightarrow T_{x_k}$  the parallel translation along the unique geodesic joining from  $x_k$  to  $x^*$ .

Before proving Proposition 11, we first establish the following intermediate result which provides useful estimates.

**Proposition 12.** *Under the assumptions of Proposition 11, we have*

$$\begin{aligned}
\|y_{a,k} - x^*\| &= O(\|d_k\|), \quad \|y_{b,k} - x^*\| = O(\|d_k\|), \quad \|r_{k+1}\| = O(\|d_k\|), \\
(\tau_{k+1}^{-1} P_{T_{x_{k+1}}} - P_{T_{x^*}})(\nabla F(y_{b,k}) - \nabla F(x_{k+1})) &= o(\|d_k\|).
\end{aligned} \tag{27}$$

and

$$\|P(Q_k - Q)r_{k+1}\| = o(\|d_k\|), \quad \|(M_k - M)d_k\| = o(\|d_k\|). \tag{28}$$

**Proof.** Since  $|a_{i,k}| \leq 1$ , then

$$\begin{aligned}
\|y_{a,k} - x^*\| &= \|x_k + \sum_{i \in I} a_{i,k}(x_{k-i} - x_{k-i-1}) - x^* + \sum_{i \in I} a_{i,k}(x^* - x^*)\| \\
&\leq \|x_k - x^*\| + \sum_{i \in I} a_{i,k}(\|x_{k-i} - x^*\| + \|x_{k-i-1} - x^*\|) \\
&\leq 2 \sum_{i \in I} \|r_{k-i}\| \leq 2\sqrt{s+1}\|d_k\|,
\end{aligned} \tag{29}$$

hence we get the first and second estimates. From prox-regularity of  $R$  at  $x^*$  for  $-\nabla F(x^*)$ , invoking [15, Proposition 13.37], we have that there exists  $\bar{r} > 0$  such that for all  $\gamma_k \in ]0, \min(\bar{\gamma}, \bar{r})[$ , there exists a neighbourhood  $U$  of  $x^* - \gamma_k \nabla F(x^*)$  on which  $\text{Prox}_{\gamma_k R}$  is single-valued and  $l$ -Lipschitz continuous with  $l = \bar{r}/(\bar{r} - \gamma_k)$ . Since  $\nabla F$  is continuous and  $x_k \rightarrow x^*$ , we have  $y_{a,k} - \gamma_k \nabla F(y_{b,k}) \rightarrow x^* - \gamma_k \nabla F(x^*)$ . In turn,  $y_{a,k} - \gamma_k \nabla F(y_{b,k}) \in U$  for all  $k$  sufficiently large. Thus, we obtain

$$\begin{aligned}
\|r_{k+1}\| &= \|\text{Prox}_{\gamma_k R}(y_{a,k} - \gamma_k \nabla F(y_{b,k})) - \text{Prox}_{\gamma_k R}(x^* - \gamma_k \nabla F(x^*))\| \\
&\leq l\|(y_{a,k} - x^*) - \gamma_k(\nabla F(y_{b,k}) - \nabla F(x^*))\| \\
&\leq l(\|y_{a,k} - x^*\| + \gamma_k L\|y_{b,k} - x^*\|) \\
&\leq 2\sqrt{s+1}(1 + \gamma_k L)\|d_k\| \leq 4\sqrt{s+1}\|d_k\|,
\end{aligned} \tag{30}$$

which yields the third estimate. Combining Lemma 9, (29) and (30), we get

$$\begin{aligned}
(\tau_{k+1}^{-1} P_{T_{x_{k+1}}} - P_{T_{x^*}})(\nabla F(y_{b,k}) - \nabla F(x_{k+1})) &= o(\|\nabla F(y_{b,k}) - \nabla F(x_{k+1})\|) \\
&= o(\|y_{b,k} - x^*\|) + o(\|r_{k+1}\|) = o(\|d_k\|).
\end{aligned}$$

Let's now turn to (28). First, define the function  $\bar{R}(x) \stackrel{\text{def}}{=} R(x) + \langle x, \nabla F(x^*) \rangle$ . From the smooth perturbation rule of partial smoothness [9, Corollary 4.7],  $\bar{R} \in \text{PSF}_{x^*}(\mathcal{M}_{x^*})$ . Moreover, from Fact 8 and normal sharpness, the Riemannian Hessian of  $\bar{R}$  at  $x^*$  is such that,  $\forall h \in T_{x^*}$ ,

$$\begin{aligned}
\gamma \nabla_{\mathcal{M}_{x^*}}^2 \bar{R}(x^*)h &= \gamma P_{T_{x^*}} \nabla^2 \tilde{\bar{R}}(x^*)h + \gamma \mathfrak{W}_{x^*}(h, P_{T_{x^*}^\perp} \nabla \tilde{\bar{R}}(x^*)) \\
&= \gamma P_{T_{x^*}} \nabla^2 \tilde{\bar{R}}(x^*)h + \gamma \mathfrak{W}_{x^*}(h, P_{T_{x^*}^\perp} \nabla \tilde{\Phi}(x^*)) \\
&= \gamma \nabla_{\mathcal{M}_{x^*}}^2 \Phi(x^*) P_{T_{x^*}} h - Hh = Qh,
\end{aligned}$$

where  $\tilde{\cdot}$  is the smooth representative of the corresponding function. We have

$$\begin{aligned} \lim_{k \rightarrow \infty} \frac{\|P(Q_k - Q)r_{k+1}\|}{\|r_{k+1}\|} &= \lim_{k \rightarrow \infty} \frac{\|P(\gamma_k - \gamma)\nabla_{\mathcal{M}_{x^*}}^2 \bar{R}(x^*)P_{T_{x^*}} r_{k+1}\|}{\|r_{k+1}\|} \\ &\leq \lim_{k \rightarrow \infty} |\gamma_k - \gamma| \|P\| \|\nabla_{\mathcal{M}_{x^*}}^2 \bar{R}(x^*)P_{T_{x^*}}\| = 0, \end{aligned}$$

which entails  $\|P(Q_k - Q)r_{k+1}\| = o(\|r_{k+1}\|) = o(\|d_k\|)$ . Similarly, since  $H$  is Lipschitz, we have

$$\lim_{k \rightarrow \infty} \frac{\|P(G_k - G)r_k\|}{\|r_k\|} = \lim_{k \rightarrow \infty} \frac{\|P(\gamma_k - \gamma)Hr_k\|}{\|r_k\|} \leq \lim_{k \rightarrow \infty} |\gamma_k - \gamma| L \|P\| = 0. \quad (31)$$

Now, let's consider  $(M_k - M)d_k$

$$M_k - M = \begin{bmatrix} M_{k,0} - M_0 & M_{k,1} - M_1 & \cdots & M_{k,s-1} - M_{s-1} & M_{k,s} - M_s \\ 0 & 0 & \cdots & 0 & 0 \\ 0 & 0 & \cdots & 0 & 0 \\ \vdots & \vdots & \ddots & \vdots & \vdots \\ 0 & 0 & \cdots & 0 & 0 \end{bmatrix}.$$

Take  $(M_{k,0} - M_0)r_k$ , we have

$$\begin{aligned} &(M_{k,0} - M_0)r_k \\ &= ((a_{k,0} - b_{k,0})P + (1 + b_{k,0})PG_k)r_k - ((a_0 - b_0)P + (1 + b_0)PG)r_k \\ &= ((a_{k,0} - b_{k,0}) - (a_0 - b_0))Pr_k + (1 + b_{k,0})P(G_k - G)r_k + (b_{k,0} - b_0)PGr_k. \end{aligned}$$

Since we assume that  $a_{i,k} \rightarrow a_i$ ,  $b_{i,k} \rightarrow b_i$ ,  $i = 0, 1$  and  $\gamma_k \rightarrow \gamma$ , plus (31), it can be shown that

$$\begin{aligned} &\lim_{k \rightarrow \infty} \frac{\|(M_{k,0} - M_0)r_k\|}{\|r_k\|} \\ &\leq \lim_{k \rightarrow \infty} |(a_{k,0} - b_{k,0}) - (a_0 - b_0)| \|P\| + |1 + b_{k,0}| |\gamma_k - \gamma| L \|P\| + |b_{k,0} - b_0| \|P\| \|G\| = 0, \end{aligned}$$

that is  $\|(M_{k,0} - M_0)r_k\| = o(\|r_k\|)$ . Using the same arguments, we can show that

$$\|(M_{k,i} - M_i)r_{k-i}\| = o(\|r_{k-i}\|), \quad i = 1, \dots, s-1 \quad \text{and} \quad \|(M_{k,s} - M_s)r_{k,s}\| = o(\|r_{k,s}\|).$$

Assemble them together, we obtain

$$\|(M_k - M)d_k\| = o(\|d_k\|),$$

which concludes the proof.  $\square$

**Proof of Proposition 11.** From the update (1.7) and the condition for a critical point  $x^*$  of problem  $(P)$ , we have

$$\begin{aligned} y_{a,k} - x_{k+1} - \gamma_k (\nabla F(y_{b,k}) - \nabla F(x_{k+1})) &\in \gamma_k \partial \Phi(x_{k+1}) \\ 0 &\in \gamma_k \partial \Phi(x^*). \end{aligned}$$

Projecting into  $T_{x_{k+1}}$  and  $T_{x^*}$ , respectively, and using Fact 8, leads to

$$\begin{aligned} \gamma_k \tau_{k+1}^{-1} \nabla_{\mathcal{M}_{x^*}} \Phi(x_{k+1}) &= \tau_{k+1}^{-1} P_{T_{x_{k+1}}} (y_{a,k} - x_{k+1} - \gamma_k (\nabla F(y_{b,k}) - \nabla F(x_{k+1}))) \\ \gamma_k \nabla_{\mathcal{M}_{x^*}} \Phi(x^*) &= 0. \end{aligned}$$

Adding both identities, and subtracting  $\tau_{k+1}^{-1} P_{T_{x_{k+1}}} x^*$  on both sides, we arrive at

$$\begin{aligned} &\tau_{k+1}^{-1} P_{T_{x_{k+1}}} r_{k+1} + \gamma_k (\tau_{k+1}^{-1} \nabla_{\mathcal{M}_{x^*}} \Phi(x_{k+1}) - \nabla_{\mathcal{M}_{x^*}} \Phi(x^*)) \\ &= \tau_{k+1}^{-1} P_{T_{x_{k+1}}} (y_{a,k} - x^*) - \gamma_k \tau_{k+1}^{-1} P_{T_{x_{k+1}}} (\nabla F(y_{b,k}) - \nabla F(x_{k+1})). \end{aligned} \quad (32)$$

By virtue of Lemma 9, we get

$$\tau_{k+1}^{-1} P_{T_{x_{k+1}}} r_{k+1} = P_{T_{x^*}} r_{k+1} + (\tau_{k+1}^{-1} P_{T_{x_{k+1}}} - P_{T_{x^*}}) r_{k+1} = P_{T_{x^*}} r_{k+1} + o(\|r_{k+1}\|).$$

Using [11, Lemma 5.1], we also have

$$r_{k+1} = P_{T_{x^*}} r_{k+1} + o(\|r_{k+1}\|),$$

and thus

$$\tau_{k+1}^{-1} P_{T_{x_{k+1}}} r_{k+1} = r_{k+1} + o(\|r_{k+1}\|) = r_{k+1} + o(\|d_k\|), \quad (33)$$

where we also used (27). Similarly

$$\begin{aligned} & \tau_{k+1}^{-1} P_{T_{x_{k+1}}} (y_{a,k} - x^*) \\ &= P_{T_{x^*}} (y_{a,k} - x^*) + (\tau_{k+1}^{-1} P_{T_{x_{k+1}}} - P_{T_{x^*}}) (y_{a,k} - x^*) \\ &= P_{T_{x^*}} (y_{a,k} - x^*) + o(\|y_{a,k} - x^*\|) = P_{T_{x^*}} (y_{a,k} - x^*) + o(\|d_k\|) \\ &= P_{T_{x^*}} (x_k - x^*) + \sum_{i \in I} a_{i,k} P_{T_{x^*}} ((x_{k-i} - x^*) - (x_{k-i-1} - x^*)) + o(\|d_k\|) \\ &= r_k + o(\|r_k\|) + \sum_{i \in I} a_{i,k} (r_{k-i} - r_{k-i-1} + o(\|r_{k-i}\|) + o(\|r_{k-i-1}\|)) + o(\|d_k\|) \\ &= r_k + \sum_{i \in I} a_{i,k} (r_{k-i} - r_{k-i-1}) + \sum_{i \in I \cup \{s\}} o(\|r_{k-i}\|) + o(\|d_k\|) \\ &= (y_{a,k} - x^*) + o(\|d_k\|). \end{aligned} \quad (34)$$

Moreover owing to Lemma 10 and (27),

$$\begin{aligned} \tau^{-1} \nabla_{\mathcal{M}_{x^*}} \Phi(x_{k+1}) - \nabla_{\mathcal{M}_{x^*}} \Phi(x^*) &= \nabla_{\mathcal{M}_{x^*}}^2 \Phi(x^*) P_{T_{x^*}} r_{k+1} + o(\|r_{k+1}\|) \\ &= \nabla_{\mathcal{M}_{x^*}}^2 \Phi(x^*) P_{T_{x^*}} r_{k+1} + o(\|d_k\|). \end{aligned} \quad (35)$$

Therefore, inserting (33), (34) and (35) into (32), we obtain

$$\begin{aligned} & (\text{Id} + \gamma_k \nabla_{\mathcal{M}_{x^*}}^2 \Phi(x^*) P_{T_{x^*}}) r_{k+1} \\ &= (y_{a,k} - x^*) - \gamma_k \tau_{k+1}^{-1} P_{T_{x_{k+1}}} (\nabla F(y_{b,k}) - \nabla F(x_{k+1})) + o(\|d_k\|). \end{aligned} \quad (36)$$

Owing to (27) and local  $C^2$ -smoothness of  $F$ , we have

$$\begin{aligned} & \tau_{k+1}^{-1} P_{T_{x_{k+1}}} (\nabla F(y_{b,k}) - \nabla F(x_{k+1})) \\ &= P_{T_{x^*}} (\nabla F(y_{b,k}) - \nabla F(x_{k+1})) + o(\|d_k\|) \\ &= P_{T_{x^*}} (\nabla F(y_{b,k}) - \nabla F(x^*)) - P_{T_{x^*}} (\nabla F(x_{k+1}) - \nabla F(x^*)) + o(\|d_k\|) \\ &= P_{T_{x^*}} \nabla^2 F(x^*) (y_{b,k} - x^*) + o(\|y_{b,k} - x^*\|) - P_{T_{x^*}} \nabla^2 F(x^*) r_{k+1} + o(\|r_{k+1}\|) + o(\|d_k\|) \\ &= P_{T_{x^*}} \nabla^2 F(x^*) P_{T_{x^*}} (y_{b,k} - x^*) - P_{T_{x^*}} \nabla^2 F(x^*) P_{T_{x^*}} (x_{k+1} - x^*) + o(\|d_k\|). \end{aligned} \quad (37)$$

Injecting (37) in (36), we get

$$\begin{aligned} & (\text{Id} + \gamma_k \nabla_{\mathcal{M}_{x^*}}^2 \Phi(x^*) P_{T_{x^*}} - \gamma_k P_{T_{x^*}} \nabla^2 F(x^*) P_{T_{x^*}}) r_{k+1} \\ &= (\text{Id} + Q_k) r_{k+1} = (y_{a,k} - x^*) - H_k (y_{b,k} - x^*) + o(\|d_k\|), \end{aligned} \quad (38)$$

which can be further written as, recall that  $H_k = \text{Id} - G_k$ ,

$$\begin{aligned}
& (\text{Id} + Q_k)r_{k+1} \\
&= (\text{Id} + Q)r_{k+1} + (Q_k - Q)r_{k+1} \\
&= (y_{a,k} - x^*) - H_k(y_{b,k} - x^*) + o(\|d_k\|) \\
&= r_k + \sum_{i \in I} a_{i,k}(r_{k-i} - r_{k-i-1}) - H_k\left(r_k + \sum_{i \in I} b_{i,k}(r_{k-i} - r_{k-i-1})\right) + o(\|d_k\|) \\
&= (1 + a_{k,0})r_k - \sum_{i=1}^{s-1} (a_{k,i-1} - a_{k,i})r_{k-i} - a_{k,s-1}r_{k-s} \\
&\quad - H_k\left((1 + b_{k,0})r_k - \sum_{i=1}^{s-1} (b_{k,i-1} - b_{k,i})r_{k-i} - b_{k,s-1}r_{k-s}\right) + o(\|d_k\|) \\
&= (1 + a_{k,0})r_k - \sum_{i=1}^{s-1} (a_{k,i-1} - a_{k,i})r_{k-i} - a_{k,s-1}r_{k-s} \\
&\quad - (1 + b_{k,0})H_k r_k + H_k \sum_{i=1}^{s-1} (b_{k,i-1} - b_{k,i})r_{k-i} + H_k b_{k,s-1}r_{k-s} + o(\|d_k\|) \\
&= ((1 + a_{k,0})\text{Id} - (1 + b_{k,0})H_k)r_k - (a_{k,s-1}\text{Id} - b_{k,s-1}H_k)r_{k-s} \\
&\quad - \sum_{i=1}^{s-1} ((a_{k,i-1} - a_{k,i})\text{Id} - (b_{k,i-1} - b_{k,i})H_k)r_{k-i} + o(\|d_k\|) \\
&= ((a_{k,0} - b_{k,0})\text{Id} + (1 + b_{k,0})G_k)r_k - ((a_{k,s-1} - b_{k,s-1})\text{Id} + b_{k,s-1}G_k)r_{k-s} \\
&\quad - \sum_{i=1}^{s-1} ((a_{k,i-1} - a_{k,i})\text{Id} - (b_{k,i-1} - b_{k,i})\text{Id} + (b_{k,i-1} - b_{k,i})G_k)r_{k-i} + o(\|d_k\|).
\end{aligned}$$

Inverting  $\text{Id} + Q$  (which is possible thanks to assumption (3.2)), we obtain

$$\begin{aligned}
& r_{k+1} + P(Q_k - Q)r_{k+1} \\
&= ((a_{k,0} - b_{k,0})P + (1 + b_{k,0})PG_k)r_k - ((a_{k,s-1} - b_{k,s-1})P + b_{k,s-1}PG_k)r_{k-s} \\
&\quad - \sum_{i=1}^{s-1} ((a_{k,i-1} - a_{k,i})P - (b_{k,i-1} - b_{k,i})P + (b_{k,i-1} - b_{k,i})PG_k)r_{k-i} + o(\|d_k\|) \\
&= M_{k,0}r_k + M_{k,s}r_{k-s} + \sum_{i=1}^{s-1} M_{k,i}r_{k-i} + o(\|d_k\|).
\end{aligned}$$

Using the estimates (28), we get

$$d_{k+1} = (M + (M_k - M))d_k + o(\|d_k\|) = Md_k + o(\|d_k\|). \quad \square$$

With the above result, we are able to prove the claim (3.6), hence Theorem 3.4.

**Proof of Theorem 3.4.** Since  $\rho(M) < 1$ , then we have  $M$  is convergent with  $\lim_{k \rightarrow \infty} M^k = 0$ . Define  $\psi_k = o(d_k)$ , suppose after  $K > 0$  iterations, (3.5) holds, then for  $k \geq K$

$$d_{k+1} = M^{k+1-K}d_K + \sum_{j=K}^k M^{k-j}\psi_j \quad (39)$$

Since the spectral radius  $\rho(M) < 1$ , then from the spectral radius formula, given any  $\rho \in ]\rho(M), 1[$ , there exists a constant  $C$  such that, for any  $k \in \mathbb{N}$

$$\|M^k\| \leq \|M\|^k \leq C\rho^k.$$

Therefore, from (39), we get

$$\begin{aligned}
\|d_{k+1}\| &\leq \|M^{k+1-K}d_K + \sum_{j=K}^k M^{k-j}\psi_j\| \\
&\leq \|M\|^{k+1-K}\|d_K\| + \sum_{j=K}^k \|M\|^{k-j}\|\psi_j\| \\
&\leq C\rho^{k+1-K}\|d_K\| + C \sum_{j=K}^k \rho^{k-j}\|\psi_j\|.
\end{aligned}$$

Together with the fact that  $\psi_j = o(\|d_j\|)$  leads to the claimed result. See also the result of [14, Section 2.1.2, Theorem 1].  $\square$

## References

- [1] P-A. Absil, R. Mahony, and J. Trumpf. An extrinsic look at the Riemannian Hessian. In *Geometric Science of Information*, pages 361–368. Springer, 2013.
- [2] H. Attouch, J. Bolte, and B. F. Svaiter. Convergence of descent methods for semi-algebraic and tame problems: proximal algorithms, Forward–Backward splitting, and regularized Gauss–Seidel methods. *Mathematical Programming*, 137(1-2):91–129, 2013.
- [3] R. I. Boş, E. R. Csetnek, and S. C. László. An inertial Forward–Backward algorithm for the minimization of the sum of two nonconvex functions. *EURO Journal on Computational Optimization*, pages 1–23, 2014.
- [4] I. Chavel. *Riemannian geometry: a modern introduction*, volume 98. Cambridge University Press, 2006.
- [5] A. Daniilidis, W. Hare, and J. Malick. Geometrical interpretation of the predictor-corrector type algorithms in structured optimization problems. *Optimization: A Journal of Mathematical Programming & Operations Research*, 55(5-6):482–503, 2009.
- [6] D. Drusvyatskiy and A. S. Lewis. Optimality, identifiability, and sensitivity. *Mathematical Programming*, pages 1–32, 2013.
- [7] P. Frankel, G. Garrigos, and J. Peypouquet. Splitting methods with variable metric for kurdyka–łojasiewicz functions and general convergence rates. *Journal of Optimization Theory and Applications*, 165(3):874–900, 2015.
- [8] J. M. Lee. *Smooth manifolds*. Springer, 2003.
- [9] A. S. Lewis. Active sets, nonsmoothness, and sensitivity. *SIAM Journal on Optimization*, 13(3):702–725, 2003.
- [10] A. S. Lewis and S. Zhang. Partial smoothness, tilt stability, and generalized Hessians. *SIAM Journal on Optimization*, 23(1):74–94, 2013.
- [11] J. Liang, J. Fadili, and G. Peyré. Local linear convergence of Forward–Backward under partial smoothness. In *Advances in Neural Information Processing Systems*, pages 1970–1978, 2014.
- [12] J. Liang, M. J. Fadili, and G. Peyré. Activity identification and local linear convergence of Forward–Backward-type methods. arXiv:1503.03703, 2015.
- [13] S. A. Miller and J. Malick. Newton methods for nonsmooth convex minimization: connections among-Lagrangian, Riemannian Newton and SQP methods. *Mathematical programming*, 104(2-3):609–633, 2005.
- [14] B. T. Polyak. *Introduction to optimization*. Optimization Software, 1987.
- [15] R. T. Rockafellar and R. Wets. *Variational analysis*, volume 317. Springer Verlag, 1998.
